# Supplementary material for: Oxygen Extraction Ratio (OER) as a Measurement of Hemodialysis (HD) Induced Tissue Hypoxia: A Pilot Study
Source: PubMed Central journal article supplement (PMC5884820; doi:10.1038/s41598-018-24024-8), 2018-04-04
Supplement: 41598_2018_24024_MOESM1_ESM.pdf [file 41598_2018_24024_MOESM1_ESM.pdf]

## **Supplemental Material**

### **Oxygen Extraction Ratio (OER) as a Measurement of Hemodialysis (HD) Induced Tissue Hypoxia. A Pilot Study**

Silverio Rotondi<sup>1</sup>, Lida Tartaglione<sup>1</sup>, Maria Luisa Muci<sup>1</sup>, Alessio Farcomeni<sup>2</sup>, Marzia Pasquali<sup>3</sup>  
and \* Sandro Mazzaferro<sup>1,4</sup>

<sup>1</sup> Nephrology and Dialysis Unit, ICOT Hospital, Polo Pontino Sapienza University of Rome.

<sup>2</sup> Department of public health and infectious diseases. Section of statistics. "Sapienza" University of Rome, Italy

<sup>3</sup> Nephrology and Dialysis Unit, Policlinico Umberto I, Rome. Italy

Department of Cardiovascular Respiratory Nephrologic Anesthetic and Geriatric Sciences, Sapienza University of Rome. Italy

Corresponding author: Prof. \* Sandro Mazzaferro, "Sapienza" University of Rome

Address: Viale del Policlinico 155 00161, Rome

Tel: 0039 0773 6513097

Fax: 0039 0773 6513254

E-mail: \* sandro.mazzaferro@uniroma1.it

**Supplemental table 1. SBP, DBP and SaO<sub>2</sub> (M±SE) during all HD sessions**

|          | Time, min            | 0'       | 15'      | 30'      | 60'      | 120'     | 240'     | p   |
|----------|----------------------|----------|----------|----------|----------|----------|----------|-----|
| HD-long  | S.B.P., mmHg         | 121±4    | 122±5    | 120±3    | 118±3    | 115±4    | 122±5    | n.s |
|          | D.B.P., mmHg         | 65±3     | 64±2     | 65±2     | 65±2     | 65±2     | 66±2     | n.s |
|          | SaO <sub>2</sub> , % | 97.3±0.3 | 97.3±0.4 | 97.1±0.3 | 97.3±0.3 | 97.3±0.3 | 93.3±0.3 | n.s |
| HD-short | S.B.P., mmHg         | 119±4    | 119±4    | 118±4    | 118±2    | 115±3    | 120±4    | n.s |
|          | D.B.P., mmHg         | 64±2     | 64±2     | 65±2     | 65±2     | 65±2     | 67±3     | n.s |
|          | SaO <sub>2</sub> , % | 97.3±0.2 | 97.2±0.3 | 97.2±0.3 | 97.2±0.3 | 97.6±0.3 | 97.6±0.3 | n.s |
| HD-iD    | S.B.P., mmHg         | 122±5    | 121±5    | 119±4    | 120±4    |          |          | n.s |
|          | D.B.P., mmHg         | 64±2     | 64±2     | 65±2     | 64±3     |          |          | n.s |
|          | SaO <sub>2</sub> , % | 97.0±0.2 | 97.0±0.3 | 96.6±0.3 | 97.1±0.3 |          |          | n.s |
| HD-iUF   | S.B.P., mmHg         | 121±4    | 119±4    | 120±5    | 116±4    |          |          | n.s |
|          | D.B.P., mmHg         | 63±2     | 64±2     | 63±2     | 64±2     |          |          | n.s |
|          | SaO <sub>2</sub> , % | 97.4±0.2 | 97.0±0.4 | 96.9±0.3 | 97.1±0.3 |          |          | n.s |

ANOVA; SBP: systolic blood pressure; DBP: diastolic blood pressure; SaO<sub>2</sub>: arterial oxygen saturation;

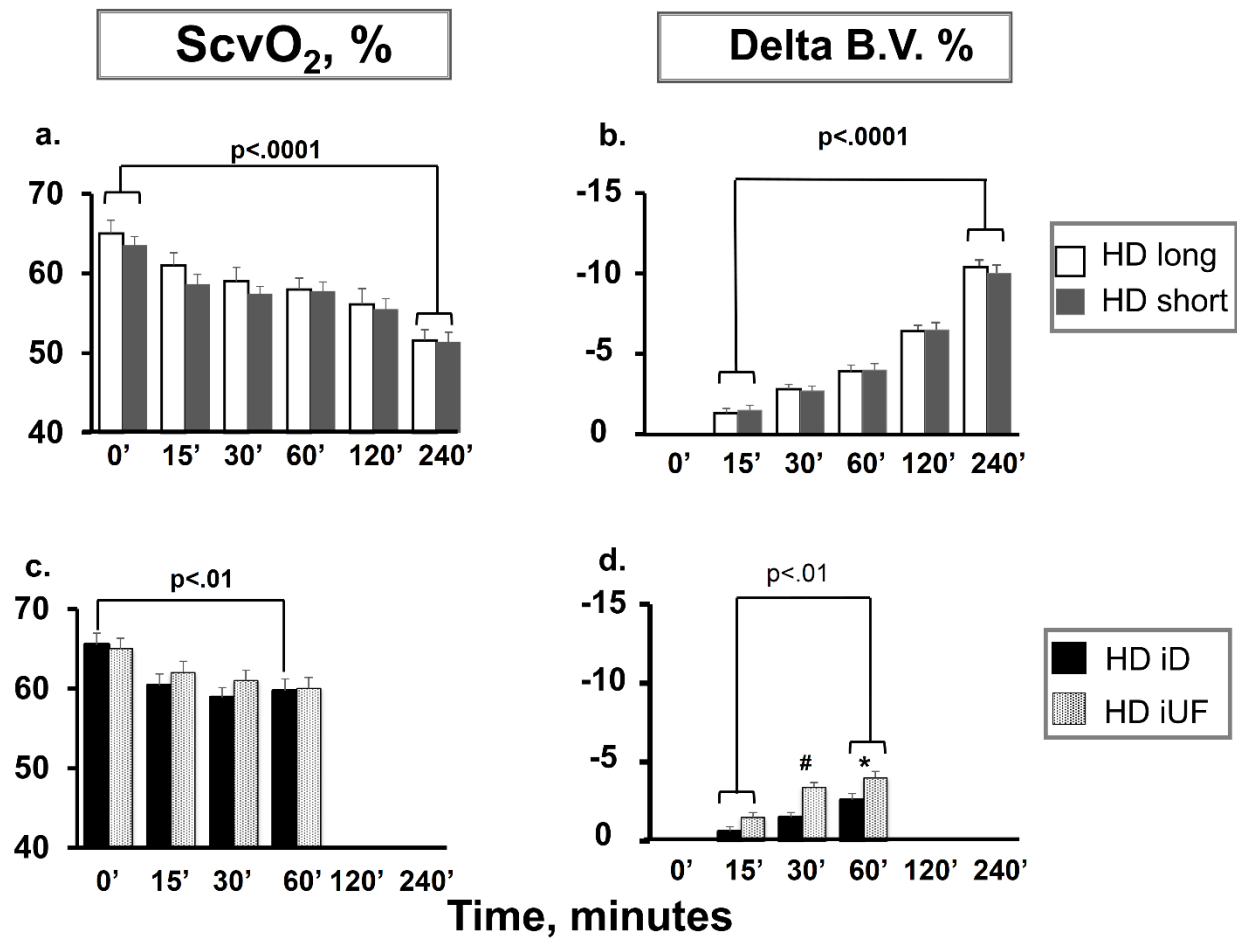

**Supplemental Figure 1.** Comparison between HDLong and HDSshort and between iD and iUF of ScvO<sub>2</sub> and BV changes during sessions. a. and b. = ScvO<sub>2</sub> and BV changed significantly (Anova,  $p < 0.001$ ) during HDLong and HDSshort, but without differences between them. c. = ScvO<sub>2</sub> dropped significantly during 60' of iD (Anova  $p < 0.01$ ) but not during iUF. However, non difference was evident between the two methods; d. = BV changed significantly with both iD (anova,  $p < 0.01$ ) and iUF ( $p < 0.01$ ), and the drop was significantly greater with iUF after 30' ( $p < 0.01$ ) and 60' ( $p < 0.05$ ). Bonferroni post-hoc test, iD vs iUF: \* $p < 0.05$ ; #  $p < 0.01$ .

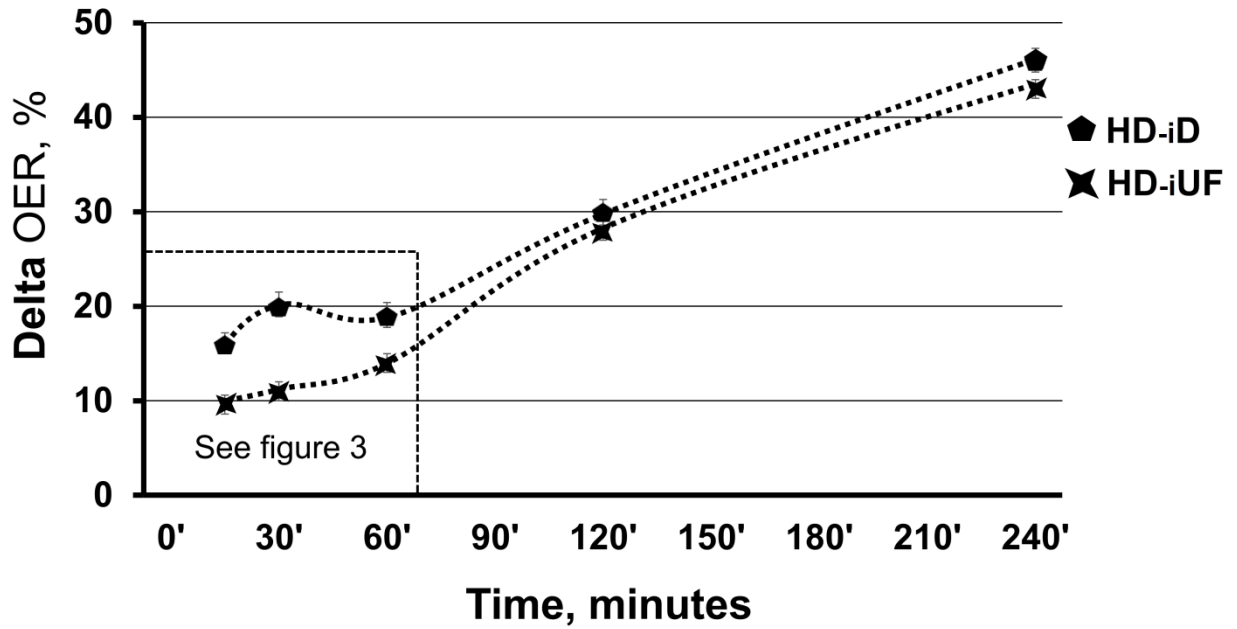

**Supplemental Figure 2.** After 1h of iD and iUF, standard HD treatment was resumed and resulted in a gradual, progressive approaching of the two OER curves, which reached final comparable values ( $44\pm 2$  and  $42\pm 2\%$  respectively).
